# Supplementary material for: Analgesic and Anticancer Activity of Benzoxazole Clubbed 2-Pyrrolidinones as Novel Inhibitors of Monoacylglycerol Lipase
Source: MDPI journal article supplement (doi:10.3390/molecules26082389), 2021-04-20
Supplement: s1 [file s1]

## **Supporting Information**

# **Analgesic and Anticancer Activity of Benzoxazole Clubbed 2-Pyrrolidinones as Novel Inhibitors of Monoacylglycerol Lipase**

**Obaid Afzal <sup>1,\*</sup>, Abdulmalik Saleh Alfawaz Altamimi <sup>1,\*</sup>, Mir Mohammad Shahroz <sup>2</sup>, Hemant Kumar Sharma <sup>2</sup>, Yassine Riadi <sup>1</sup>, and Md Quamrul Hassan <sup>3</sup>**

<sup>1</sup> Department of Pharmaceutical Chemistry, College of Pharmacy, Prince Sattam Bin Abdulaziz University, Al Kharj 11942, Saudi Arabia; y.riadi@psau.edu.sa

<sup>2</sup> Department of Pharmaceutical Chemistry, College of Pharmacy, Sri Satya Sai University of Technology and Medical Sciences, Sehore 466001, Madhya Pradesh, India; mirshahroz@gmail.com (M.M.S.); hkspharma@rediffmail.com (H.K.S.)

<sup>3</sup> Department of Pharmacology, School of Pharmaceutical Education and Research, Jamia Hamdard, New Delhi 110062, India; quamrulhassan309@gmail.com

\* Correspondence: o.akram@psau.edu.sa (O.A.); as.altamimi@psau.edu.sa (A.S.A.A.); Tel.: +96-611-588-6094 (O.A.); +96-611-588-6072 (A.S.A.A.)

## Table of contents

| S. No. | Content                                                                                                          | Page No. |
|--------|------------------------------------------------------------------------------------------------------------------|----------|
| 1.     | <sup>1</sup> H NMR spectrum of 4-(benzo[d]oxazol-2-yl)-1-benzylpyrrolidin-2-one ( <b>11</b> )                    | S3       |
| 2.     | <sup>1</sup> H NMR spectrum of 4-(benzo[d]oxazol-2-yl)-1-phenylpyrrolidin-2-one ( <b>12</b> )                    | S4       |
| 3.     | <sup>1</sup> H NMR spectrum of 4-(benzo[d]oxazol-2-yl)-1-(o-tolyl)pyrrolidin-2-one ( <b>13</b> )                 | S5       |
| 4.     | <sup>1</sup> H NMR spectrum of 4-(benzo[d]oxazol-2-yl)-1-(p-tolyl)pyrrolidin-2-one ( <b>14</b> )                 | S6       |
| 5.     | <sup>1</sup> H NMR spectrum of 4-(benzo[d]oxazol-2-yl)-1-(4-chlorophenyl)pyrrolidin-2-one ( <b>15</b> )          | S7       |
| 6.     | <sup>1</sup> H NMR spectrum of 4-(benzo[d]oxazol-2-yl)-1-(3-chloro-4-fluorophenyl)pyrrolidin-2-one ( <b>16</b> ) | S8       |
| 7.     | <sup>1</sup> H NMR spectrum of 4-(benzo[d]oxazol-2-yl)-1-(4-hydroxyphenyl)pyrrolidin-2-one ( <b>17</b> )         | S9       |
| 8.     | <sup>1</sup> H NMR spectrum of 4-(benzo[d]oxazol-2-yl)-1-(4-methoxyphenyl)pyrrolidin-2-one ( <b>18</b> )         | S10      |
| 9.     | <sup>1</sup> H NMR spectrum of 4-(benzo[d]oxazol-2-yl)-1-(4-nitrophenyl)pyrrolidin-2-one ( <b>19</b> )           | S11      |
| 10.    | <sup>1</sup> H NMR spectrum of 4-(4-(benzo[d]oxazol-2-yl)-2-oxopyrrolidin-1-yl)benzenesulfonamide ( <b>20</b> )  | S12      |
| 11.    | One dose anticancer results (NCI, USA) of compound <b>19</b>                                                     | S13      |
| 12.    | One dose anticancer results (NCI, USA) of compound <b>20</b>                                                     | S14      |

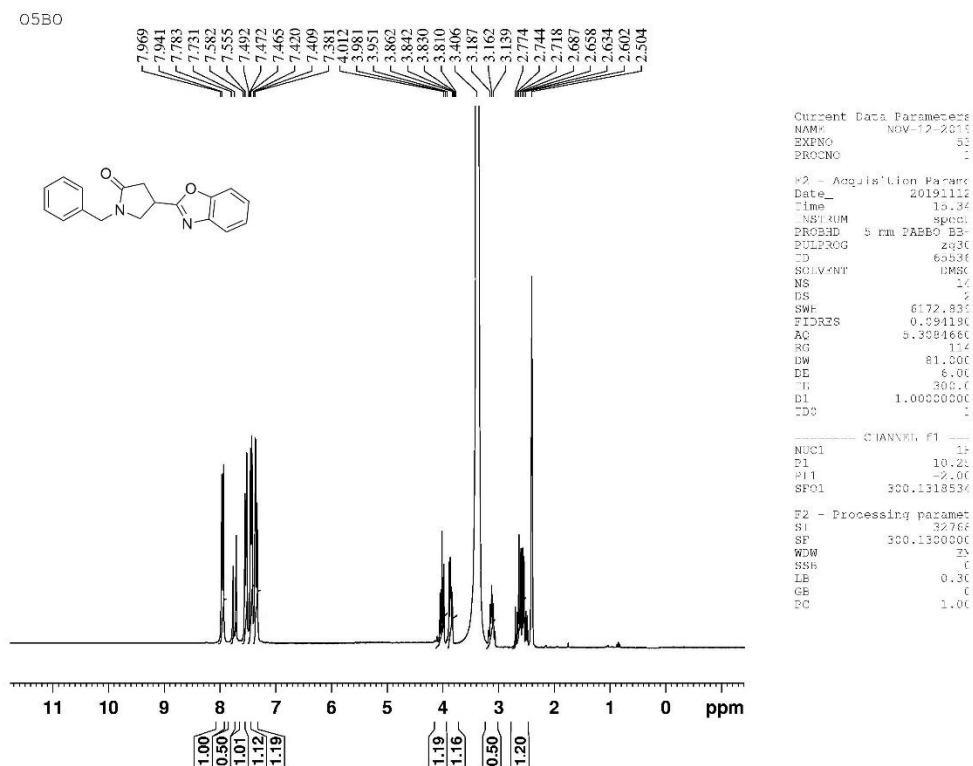

**Figure S1:**  $^1\text{H}$  NMR spectrum of 4-(benzo[d]oxazol-2-yl)-1-benzylpyrrolidin-2-one (**11**)

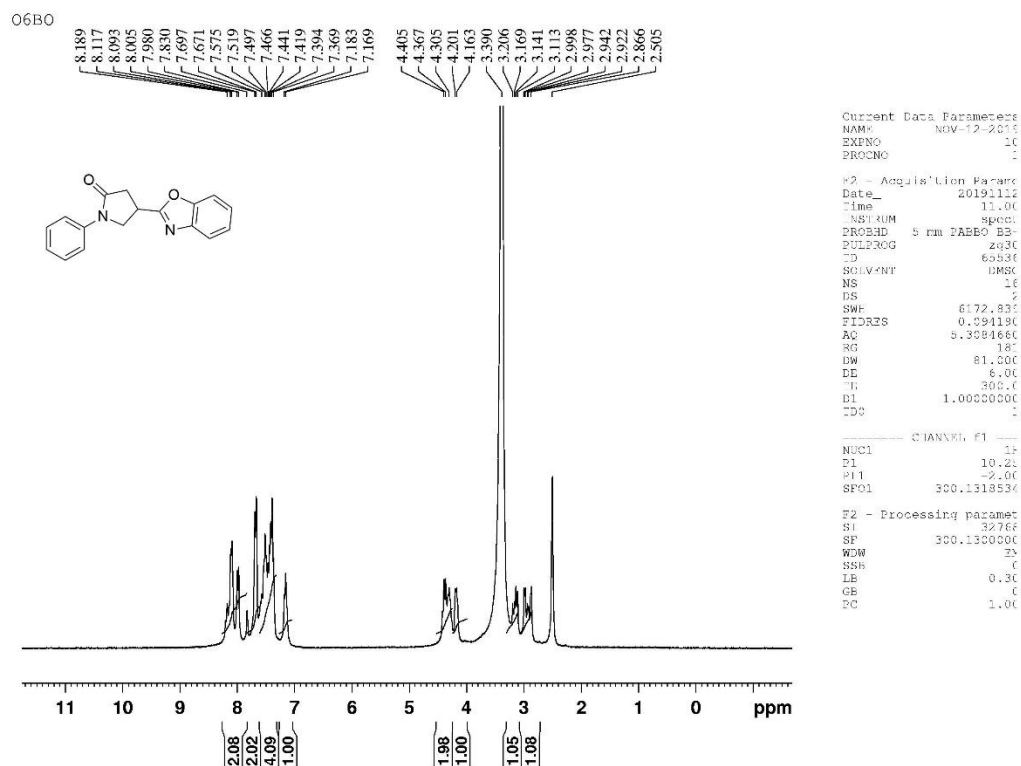

Figure S2:  $^1\text{H}$  NMR spectrum of 4-(benzo[d]oxazol-2-yl)-1-phenylpyrrolidin-2-one (12)

07B0

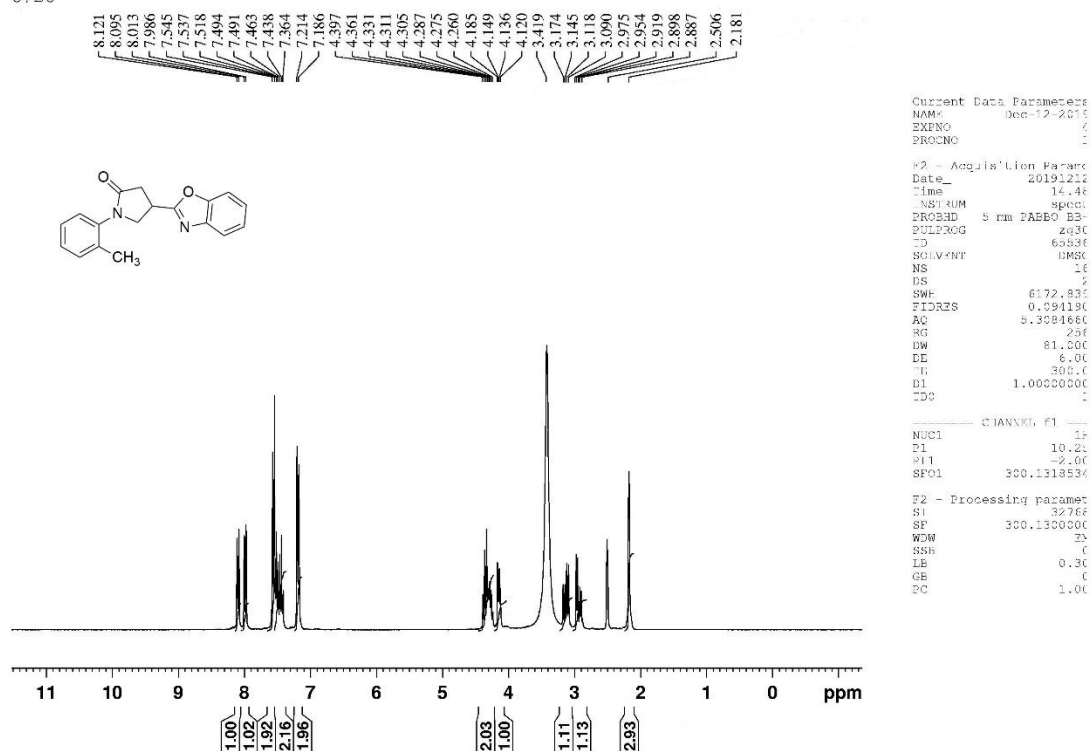

Figure S3: <sup>1</sup>H NMR spectrum of 4-(benzo[d]oxazol-2-yl)-1-(o-tolyl)pyrrolidin-2-one (13)

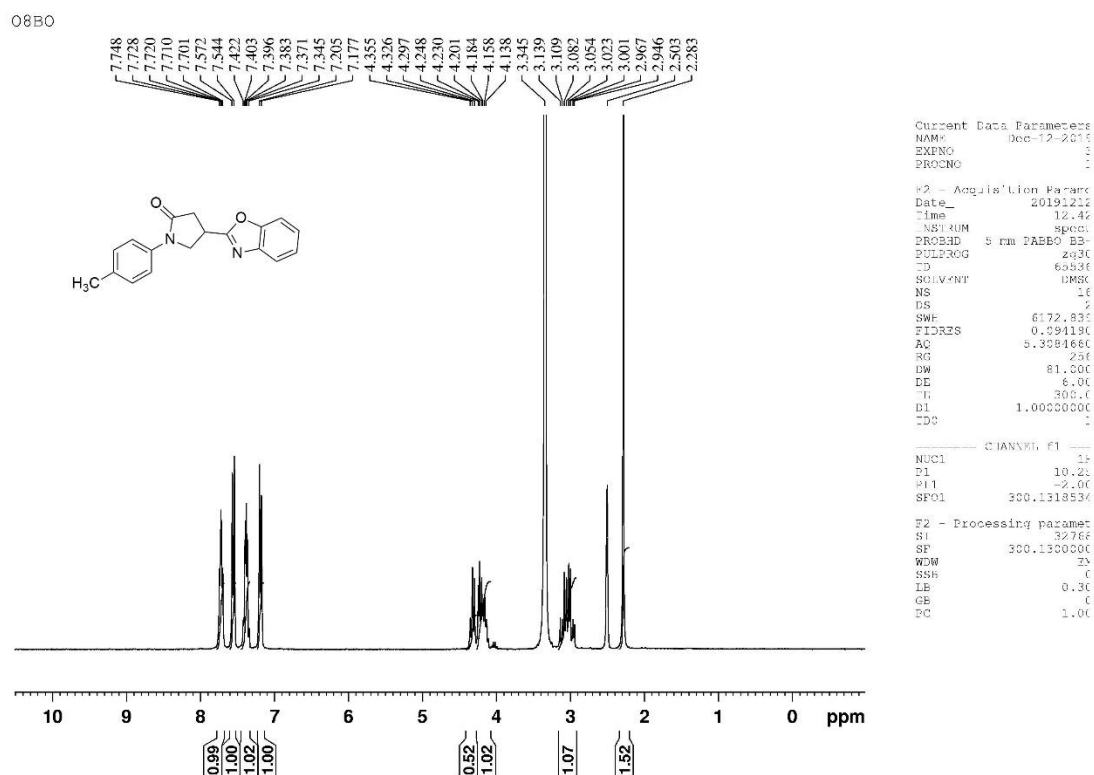

**Figure S4:**  $^1\text{H}$  NMR spectrum of 4-(benzo[d]oxazol-2-yl)-1-(*p*-tolyl)pyrrolidin-2-one (**14**)

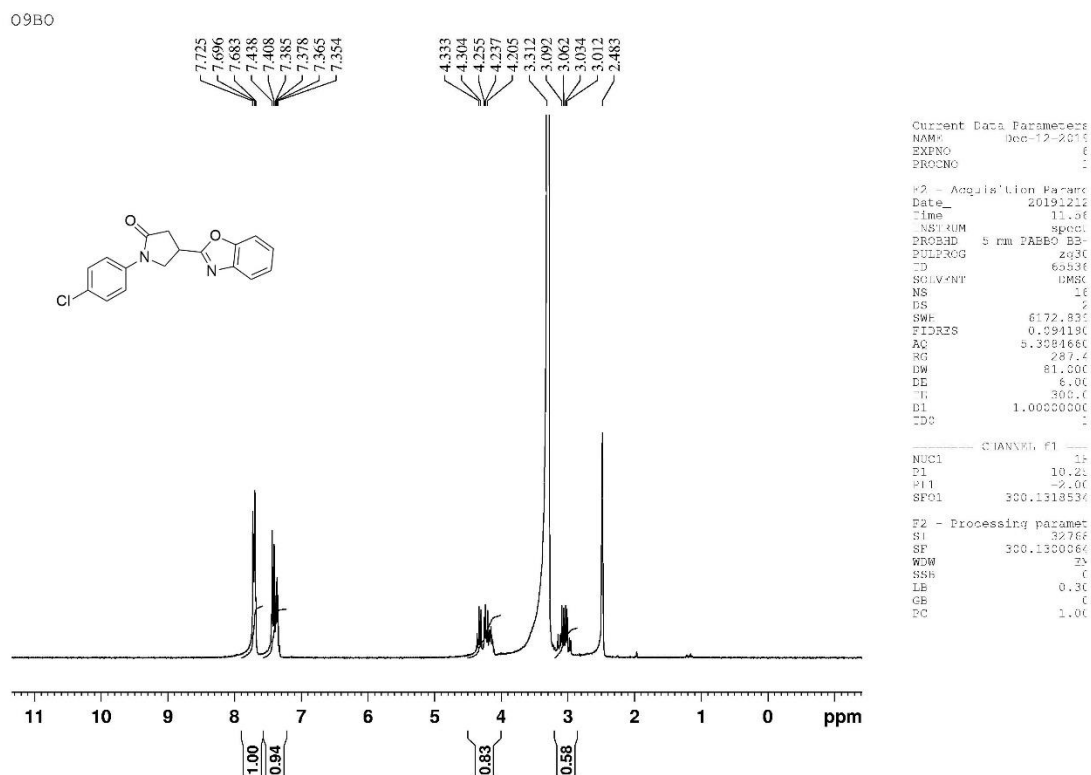

**Figure S5:**  $^1\text{H}$  NMR spectrum of 4-(benzo[d]oxazol-2-yl)-1-(4-chlorophenyl)pyrrolidin-2-one (15)

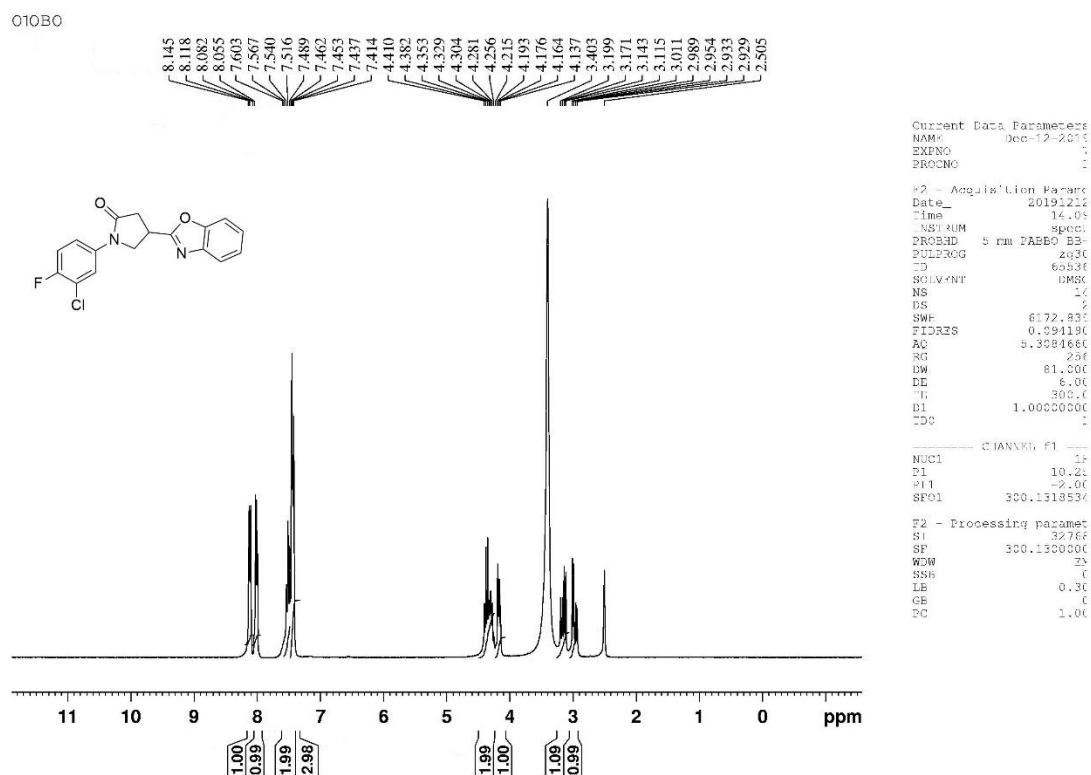

**Figure S6:**  $^1\text{H}$  NMR spectrum of 4-(benzo[d]oxazol-2-yl)-1-(3-chloro-4-fluorophenyl)pyrrolidin-2-one  
(16)



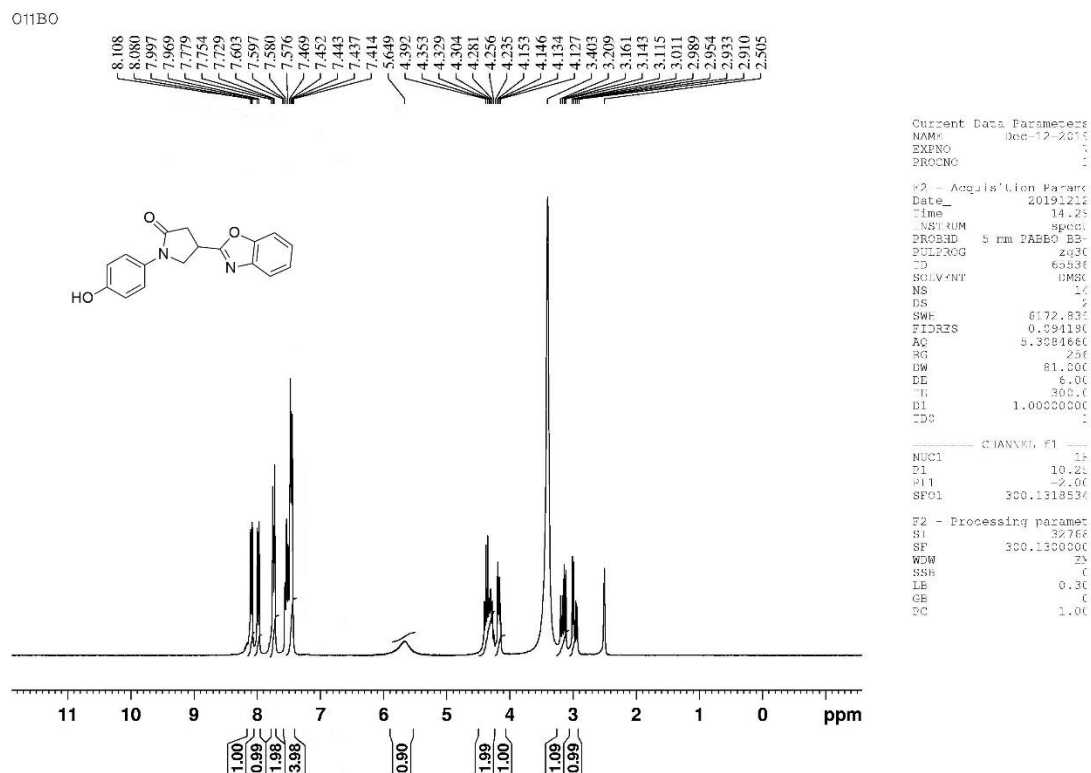

**Figure S7:**  $^1\text{H}$  NMR spectrum of 4-(benzo[d]oxazol-2-yl)-1-(4-hydroxyphenyl)pyrrolidin-2-one (17)

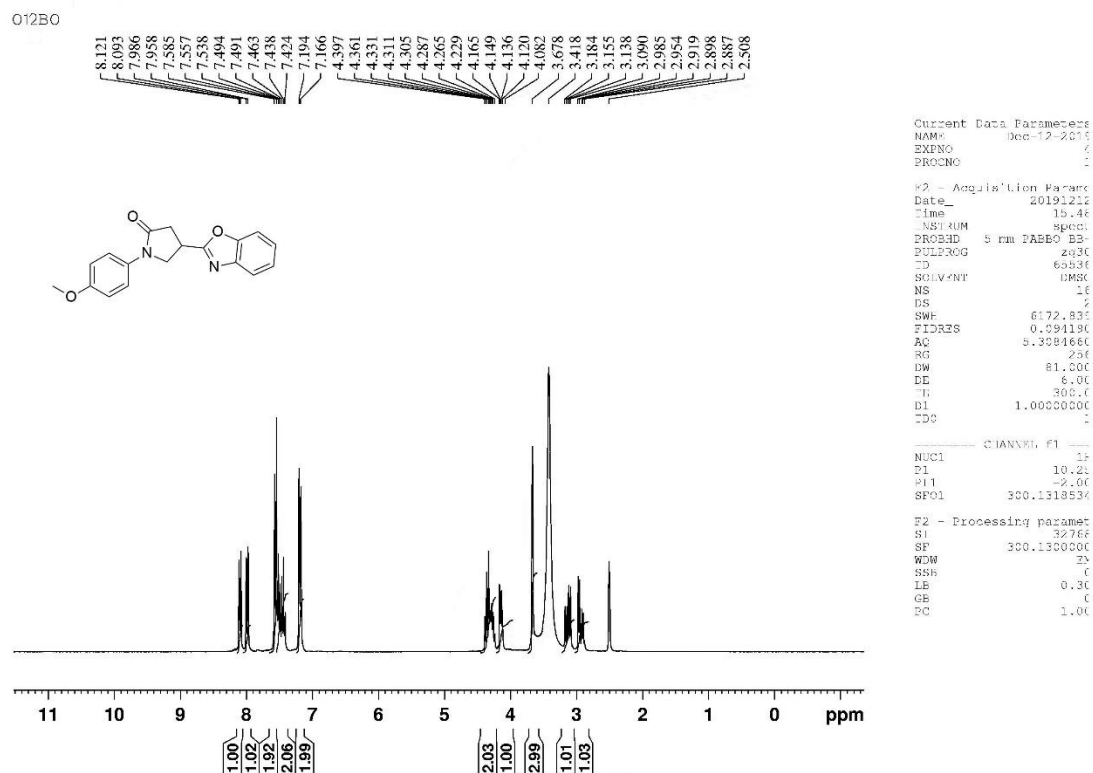

**Figure S8:**  $^1\text{H}$  NMR spectrum of 4-(benzo[d]oxazol-2-yl)-1-(4-methoxyphenyl)pyrrolidin-2-one (**18**)

013BO

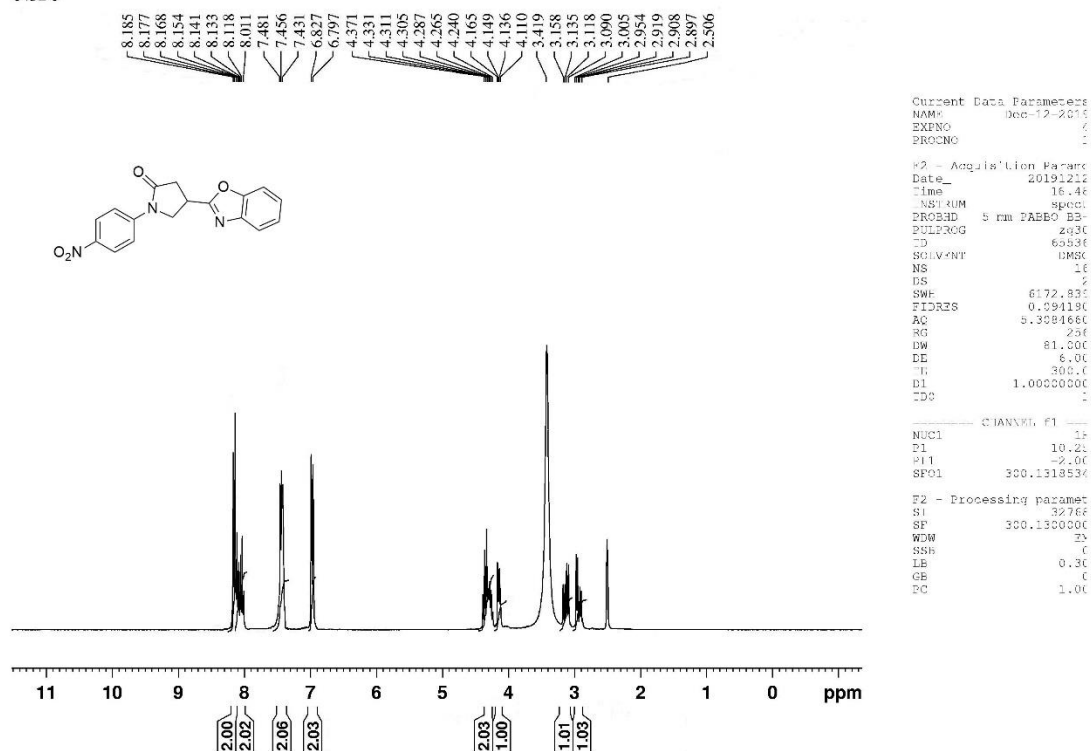

Figure S9:  $^1\text{H}$  NMR spectrum of 4-(benzo[d]oxazol-2-yl)-1-(4-nitrophenyl)pyrrolidin-2-one (19)

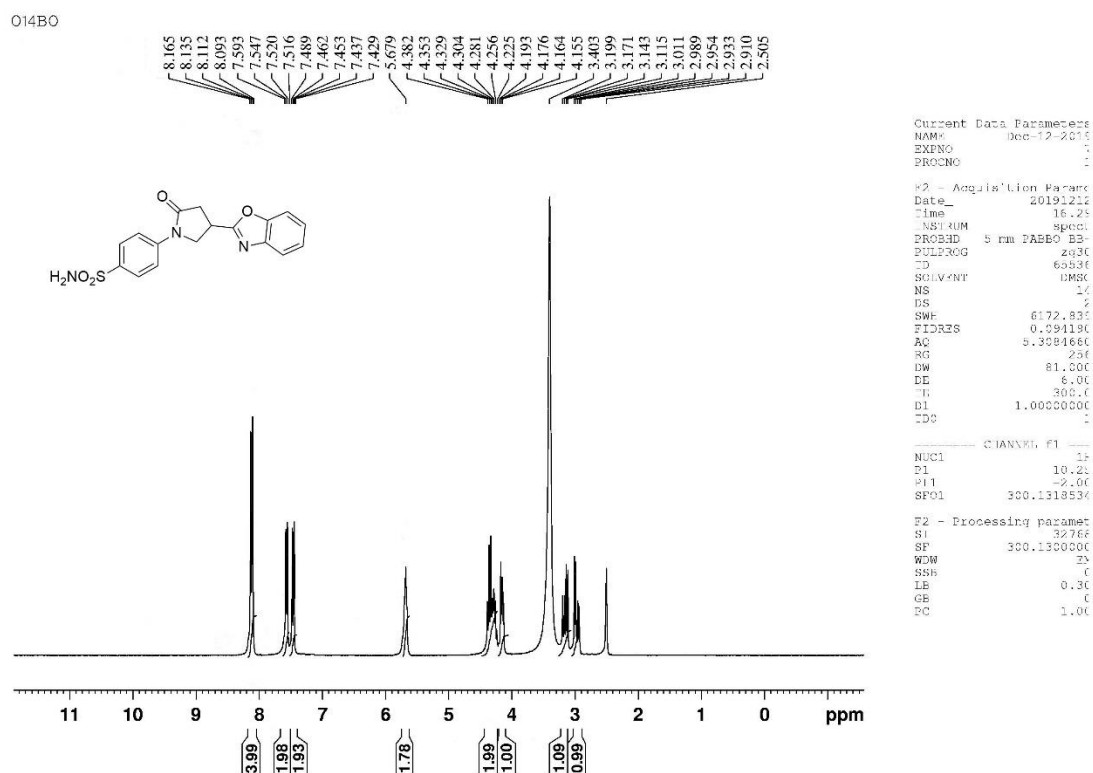

**Figure S10:**  $^1\text{H}$  NMR spectrum of 4-(4-(benzo[d]oxazol-2-yl)-2-oxopyrrolidin-1-yl)benzenesulfonamide (20)

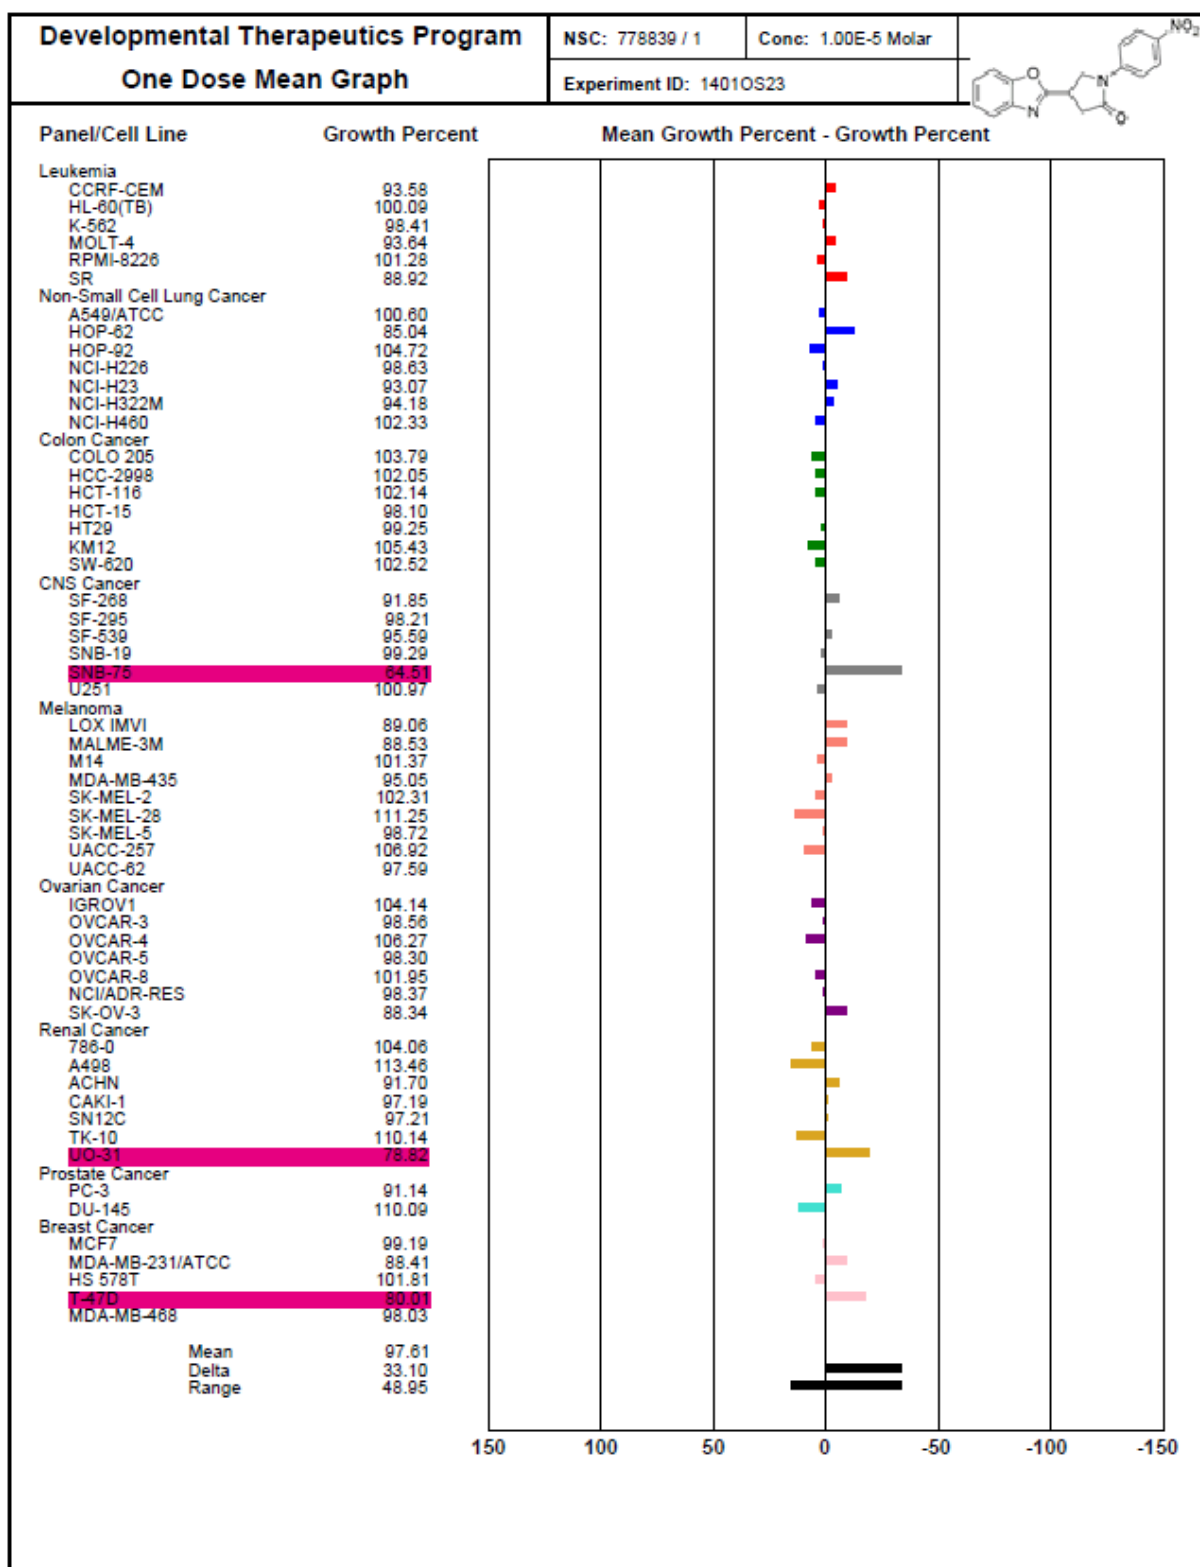

Figure S11: One dose anticancer results (NCI, USA) of compound 19.

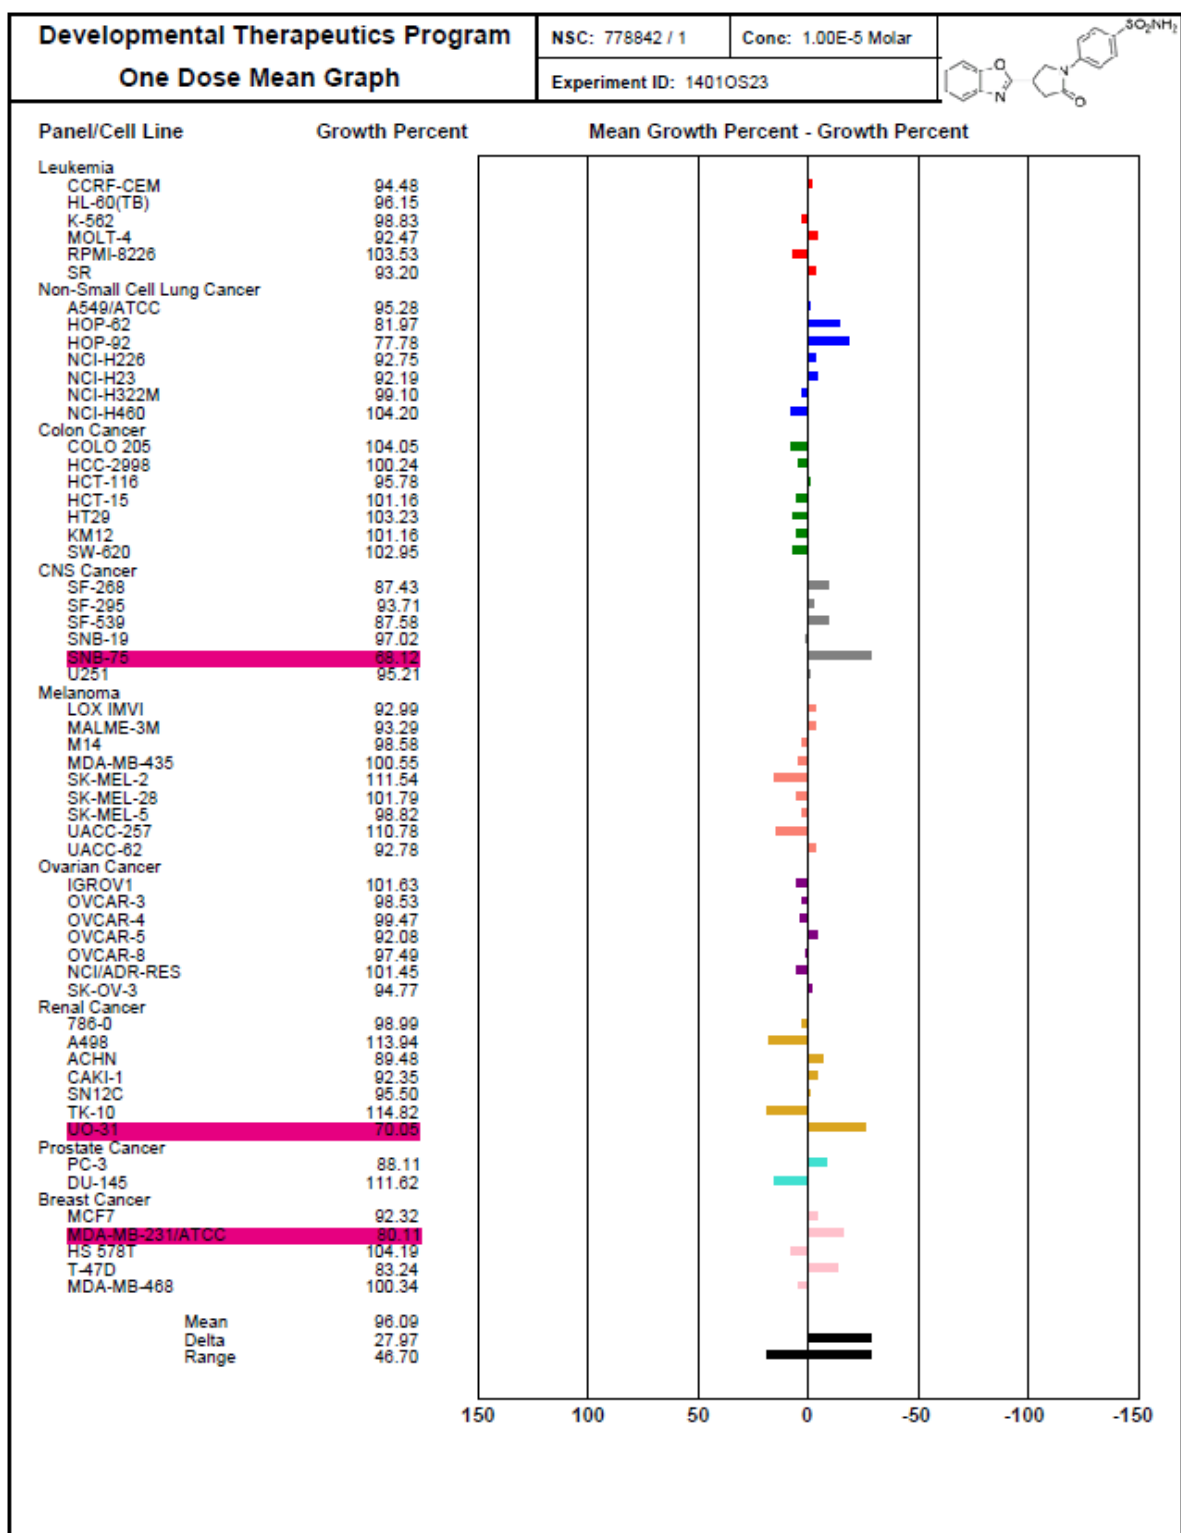

Figure S12: One dose anticancer results (NCI, USA) of compound 20.
